# Supplementary material for: Co9S8 core–shell hollow spheres for enhanced oxygen evolution and methanol oxidation reactions by sulfur vacancy engineering
Source: Royal Society of Chemistry journal article supplement (doi:10.1039/d3dt03477a), 2023-11-20
Supplement: d3dt03477a1.pdf [file d3dt03477a1.pdf]

## Supporting Information

### **Co<sub>9</sub>S<sub>8</sub> Core-Shell Hollow Spheres for Enhanced Oxygen Evolution Reaction and Methanol Oxidation Reaction by Sulfur Vacancies Engineering**

Long Li,<sup>a</sup> Zhanpeng Sheng,<sup>a</sup> Qingqing Xiao<sup>a</sup>, and Qiang Hu<sup>\*a,b</sup>

<sup>a</sup> Department of Chemistry, Lishui University, Lishui 323000, P. R. China.

<sup>b</sup> Zhejiang Zhentai Energy Technology Co. Ltd, Lishui, 323000, China.

\*E-mail: qihu@z-etechnology.cn

## **1 Materials characterizations**

The phase formation was identified using powder X-ray diffraction (XRD) (Bruker D8, Cu-K $\alpha$ ). The morphologies of the catalysts were observed by field emission scanning electron microscopy (FE-SEM, HITACHI S-4800) and transmission electron microscopy (TEM, JEOL JEM-2010). The linear scanning energy-dispersive X-ray spectrometry (EDX) and EDX elemental mappings were taken on TEM. The X-ray photoelectron spectroscopy (XPS) spectra were measured on ESCALAB 250 spectrometer (Perkin-Elmer). Raman spectra were analyzed using in-Via Raman spectrometer. The photoluminescence (PL) spectra were obtained by using a Cary Eclipse fluorescence spectrometer (Varian, USA) with Xe lamp as the excitation source. The electron paramagnetic resonance (EPR) spectra were collected at room temperature using a Bruker RPE Elexsys E500 spectrometer equipped with a SHQ with X band frequency in a continuous wave (around 9.8 GHz) cavity. The ICP-OES (PerkinElmer) was used to determine the element contents of the samples.

## **2 Electrochemical measurements**

The electrochemical tests were conducted on CHI 760E electrochemical workstation. The Ag/AgCl (saturated KCl solution) as used as the reference electrode, a graphite rod was served as the counter electrode, and all catalysts were utilized as working electrode.

### **2.1 Electrochemical OER measurements**

All electrochemical tests were performed in 1 M KOH aqueous electrolyte and the catalysts were dissolved in ethanol solution and then uniformly cast onto glassy carbon working electrode with a total loading of 0.4 mg cm<sup>-2</sup>. All the linear sweep voltammetry (LSV) measurements were taken at a scan rate of 2 mV s<sup>-1</sup> to obtain the polarization curves. Chronoamperometric measurements were performed at corresponding potential to deliver a current density of 10 mA cm<sup>-2</sup>. The Tafel slope was calculated according to the Tafel equation  $\eta = b \log (j/j_0)$  ( $\eta$  is the overpotential,

b is the Tafel slope, j is the current density, and  $j_0$  is the exchange current density). Potentials were referenced to a reversible hydrogen electrode (RHE) using the following equation: Potentials were referenced to a reversible hydrogen electrode (RHE) using the following equation:  $E(\text{RHE}) = E(\text{Ag/AgCl}) + (0.205 + 0.059\text{pH}) \text{ V}$ . The double layer capacitance ( $C_{dl}$ ) was obtained using cyclic voltammetry (CV) scanning from 1.18 to 1.24 V vs. RHE with different scan rates from 20 to 60  $\text{mV s}^{-1}$  for OER. The electrochemical impedance spectroscopy (EIS) measurements were carried out by ranging the frequency from 100 k Hz to 0.1 Hz.

### 2.1 Electrochemical MOR measurements

MOR activities were characterized via cyclic voltammetry (CV) within the potential ranging from 1.0 – 1.8 V vs. RHE at a scan rate of 50  $\text{mV s}^{-1}$ . The solution was purged with  $\text{N}_2$  for 30 min in prior to each measurement in 1.0 M KOH containing 1 M  $\text{CH}_3\text{OH}$ . The EIS measurements were carried out by ranging the frequency from 100 k Hz to 0.1 Hz in 1 M KOH containing 1 M  $\text{CH}_3\text{OH}$ . Chronoamperometric measurements were performed at corresponding potential to deliver a current density of 40  $\text{mA cm}^{-2}$  in 1 M KOH containing 1 M  $\text{CH}_3\text{OH}$ .

## 2. Supplementary figures

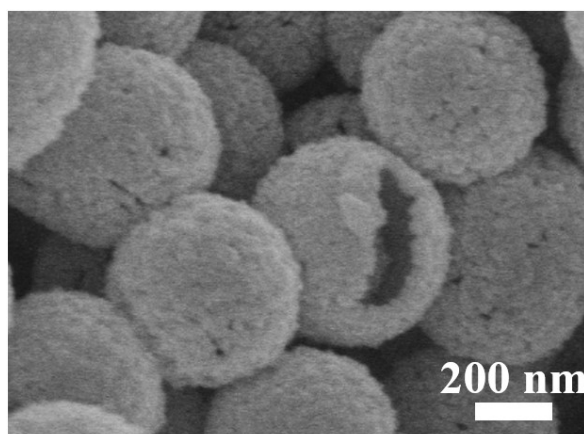

**Fig. S1** SEM image of the Co-precursor after sulfidation.

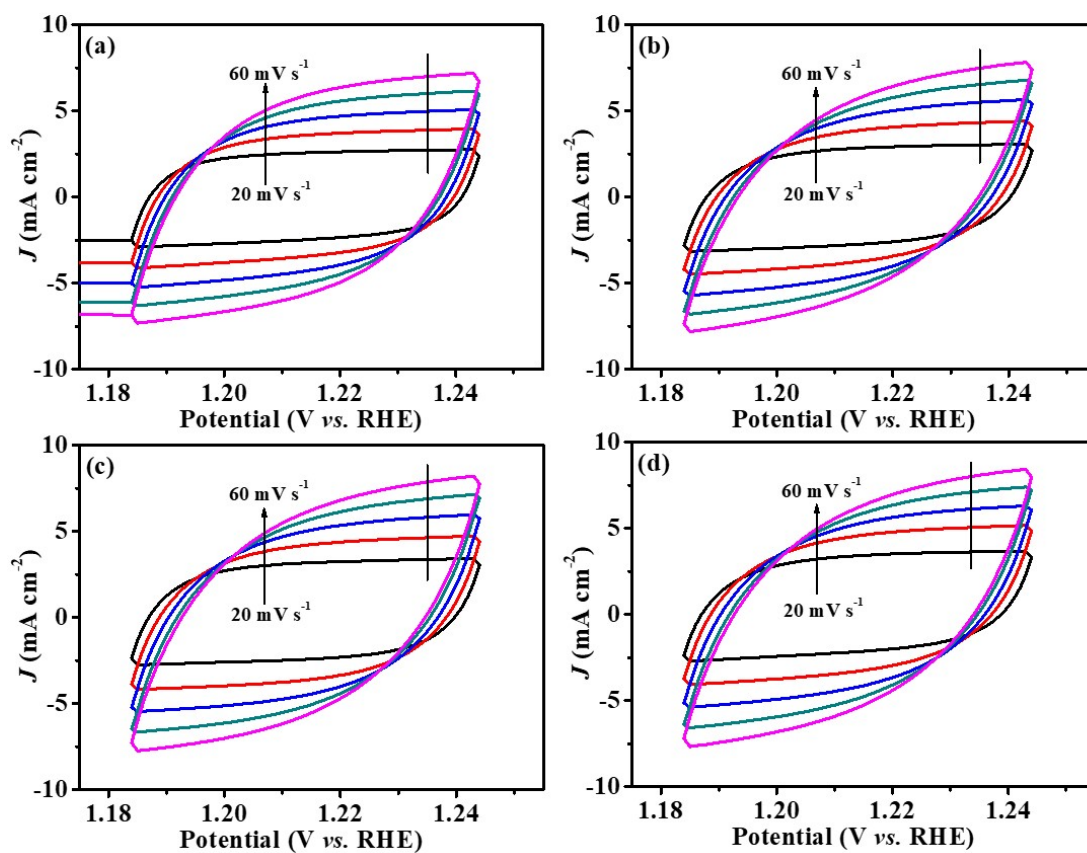

**Fig. S2** CVs tested at the potential range of 1.18 –1.24 V vs. RHE with the scan rates increasing from 20 to 60  $\text{mV s}^{-1}$  for (a)  $\text{Co}_9\text{S}_8$ , (b)  $\text{Co}_9\text{S}_{8-x}\text{-L}$ , (c)  $\text{Co}_9\text{S}_{8-x}\text{-M}$  and (d)  $\text{Co}_9\text{S}_{8-x}\text{-H}$  spheres.

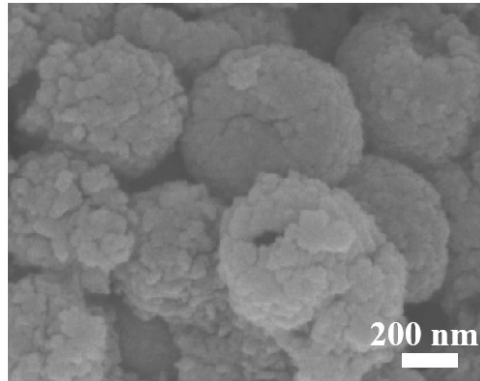

Fig. S3 SEM images of the  $\text{Co}_9\text{S}_{8-x}\text{-M}$  spheres after 10 h chronoamperometric test.

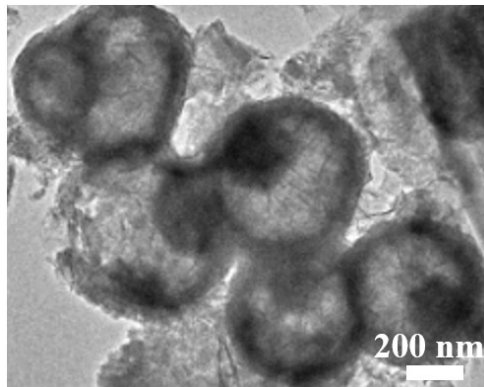

Fig. S4 TEM images of the  $\text{Co}_9\text{S}_{8-x}\text{-M}$  spheres after 10 h chronoamperometric test.

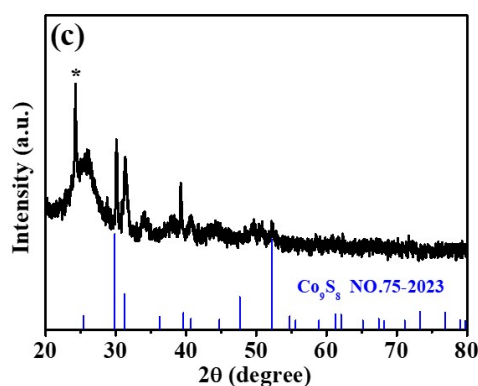

Fig. S5 XRD of the  $\text{Co}_9\text{S}_{8-x}\text{-M}$  spheres after 10 h chronoamperometric test.

As shown in the XRD of the  $\text{Co}_9\text{S}_{8-x}\text{-M}$  spheres after 10 h chronoamperometric test, a new strong peak at  $24^\circ$  appears, which is correspond to the standard diffraction pattern of  $\text{CoOOH}$ . The existence of  $\text{CoOOH}$  in the  $\text{Co}_9\text{S}_{8-x}\text{-M}$  spheres after 10 h chronoamperometric test signifies that a part of  $\text{Co}_9\text{S}_8$  transform into  $\text{CoOOH}$  during OER process, which is consistent with the transformation reported in the literature.<sup>1-3</sup>

Table S1 The amount of Co and S, and the ratio of Co-to-S ratio of  $\text{Co}_9\text{S}_{8-x}\text{-M}$  spheres.

| Sample                                       | amount of Co<br>( $\text{mol L}^{-1}$ ) | amount of S<br>( $\text{mol L}^{-1}$ ) | Co-to-S ratio |
|----------------------------------------------|-----------------------------------------|----------------------------------------|---------------|
| $\text{Co}_9\text{S}_{8-x}\text{-M}$ spheres | $0.103 \times 10^{-3}$                  | $0.088 \times 10^{-3}$                 | 9:7.7         |

The Co-to-S ratio of  $\text{Co}_9\text{S}_{8-x}\text{-M}$  spheres is 9:7.7 through ICP-AES, so the cobalt sulfide in this work is  $\text{Co}_9\text{S}_8$  considering that their XRD characterization is correspond to the standard diffraction pattern of  $\text{Co}_9\text{S}_8$  (JCPDS 75-2023).

1. J. S. Kim, I. Park, E.-S. Jeong, K. Jin, W. M. Seong, G. Yoon, H. Kim, B. Kim, K. T. Nam and K. Kang, *Adv. Mater.*, 2017, **29**, 1606893.
2. Z. Wang, Z. Lin, J. Deng, S. Shen, F. Meng, J. Zhang, Q. Zhang, W. Zhong and L. Gu, *Adv. Energy Mater.*, 2021, **11**, 2003023.
3. L. Wang, Q. Zhou, Z. Pu, Q. Zhang, X. Mu, H. Jing, S. Liu, C. Chen and S. Mu, *Nano Energy*, 2018, **53**, 270-276.
